# Supplementary material for: Geospatial input data for the PALM model system 6.0: model requirements, data sources and processing
Source: Copernicus journal article supplement (doi:10.5194/gmd-13-5833-2020), 2020-11-27
Supplement: Supplementary file 1 [file gmd-13-5833-2020-supplement.zip]

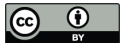

*Supplement of*

## **Geospatial input data for the PALM model system 6.0: model requirements, data sources and processing**

**Wieke Heldens et al.**

*Correspondence to:* Wieke Heldens ([wieke.heldens@dlr.de](mailto:wieke.heldens@dlr.de))

- [gmd-13-5833-2020-supplement-title-page.pdf](#)
- data
  - README.txt
  - winter\_iop\_small\_static\_N02

The copyright of individual parts of the supplement might differ from the CC BY 4.0 License.
